# Supplementary material for: Silylated-Acetylated Cyclodextrins as Chiral Sensors for the Enantiodiscrimination of Fluorinated Anesthetics
Source: MDPI journal article supplement (doi:10.3390/molecules28062804), 2023-03-20

# Silylated-acetylated cyclodextrins as chiral sensors for the enantiodiscrimination of fluorinated anesthetics

Alessandra Recchimurzo <sup>1</sup>, Federica Balzano <sup>1,\*</sup>, Gloria Uccello Barretta <sup>1,\*</sup>, Luca Gherardi <sup>1</sup>, Milo Malanga <sup>2</sup> and Federica Aiello <sup>3</sup>

<sup>1</sup> Department of Chemistry and Industrial Chemistry, University of Pisa, Via G. Moruzzi 13, 56124 Pisa, Italy; [alessandra.recchimurzo@phd.unipi.it](mailto:alessandra.recchimurzo@phd.unipi.it) (A.R.); [luca.gherardi@phd.unipi.it](mailto:luca.gherardi@phd.unipi.it) (L.G.)

<sup>2</sup> CycloLab, Cyclodextrin R&D Ltd, Budapest, H-1097 Illatos út 7, Hungary; [milomalanga@gmail.com](mailto:milomalanga@gmail.com) (M.M.)

<sup>3</sup> National Research Council, Institute for Chemical and Physical Processes (CNR-IPCF), Via G. Moruzzi 1, 56124 Pisa, Italy; [federica.aiello@cnr.it](mailto:federica.aiello@cnr.it)

\* Correspondence: [federica.balzano@unipi.it](mailto:federica.balzano@unipi.it) (F.B.); [gloria.uccello.barretta@unipi.it](mailto:gloria.uccello.barretta@unipi.it) (G.U.B.); Tel.: +390502219232 (F.B., G.U.B.)

## Supplementary Material

### Table of contents

Scheme S1. Synthetic strategy for silylated-acetylated cyclodextrins.

Figure S1. <sup>1</sup>H (600 MHz, 30 mM, 25 °C, C<sub>6</sub>D<sub>12</sub>) NMR spectra of racemic ISO (a) alone and (b) in the presence of AcSiγCD to give a ISO/CD molar ratio of 16:1.

Table S1. <sup>1</sup>H (600 MHz, C<sub>6</sub>D<sub>12</sub>, 25 °C) and <sup>19</sup>F (564 MHz, C<sub>6</sub>D<sub>12</sub>, 25 °C) NMR non-equivalences ( $|\delta_R - \delta_S|$ , ppm) measured for ISO resonances in the presence of equimolar amounts of AcSiαCD, AcSiβCD or AcSiγCD at 10 mM and 30 mM concentration.

Table S2. <sup>1</sup>H (600 MHz, C<sub>6</sub>D<sub>12</sub>, 25 °C) and <sup>19</sup>F (564 MHz, C<sub>6</sub>D<sub>12</sub>, 25 °C) NMR non-equivalences ( $|\delta_R - \delta_S|$ , ppm) of DSF (30 mM) in the presence of AcSiβCD or AcSiγCD at different molar ratios; the results reported in parenthesis refer to the 10 mM concentration.

Table S3. <sup>1</sup>H (600 MHz, C<sub>6</sub>D<sub>12</sub>, 25 °C) and <sup>19</sup>F (564 MHz, C<sub>6</sub>D<sub>12</sub>, 25 °C) NMR non-equivalences ( $|\delta_R - \delta_S|$ , ppm) of HAL (30 mM) in the presence of AcSiγCD at different molar ratios; the results reported in parenthesis refer to the 10 mM concentration.

Figure S2. <sup>1</sup>H (600 MHz, 25 °C, C<sub>6</sub>D<sub>12</sub>) and <sup>19</sup>F (564 MHz, 25 °C, C<sub>6</sub>D<sub>12</sub>) NMR spectra of HAL (30 mM) alone (a, f), in the presence of (left) AcSiβCD to give a HAL/CD molar ratio of 7:1 (b), 3.5:1 (c), 2:1 (d) and 1:1 (e), and in the presence of (right) AcSiγCD to give a HAL/CD molar ratio of 8:1 (g), 4:1 (h), 3:1 (i), 2:1 (j) and 1:1 (k).

Table S4. <sup>1</sup>H (600 MHz, C<sub>6</sub>D<sub>12</sub>, 25 °C) and <sup>19</sup>F (564 MHz, C<sub>6</sub>D<sub>12</sub>, 25 °C) NMR non-equivalences ( $|\delta_R - \delta_S|$ , ppm) of ENF (30 mM) in the presence of AcSiβCD or AcSiγCD at different molar ratio; the results reported in parenthesis refer to the 10 mM concentration.

Figure S3. <sup>1</sup>H (600 MHz, 25 °C, C<sub>6</sub>D<sub>12</sub>) NMR spectra of ENF (30 mM) alone (a, f), in the presence of (left) AcSiβCD to give a ENF/CD molar ratio of 7:1 (b), 3.5:1 (c), 2:1 (d) and 1:1 (e), and in the presence of (right) AcSiγCD to give a ENF/CD molar ratio of 8:1 (g), 4:1 (h), 3:1 (i), 2:1 (j) and 1:1 (k).

Table S5.  $^1\text{H}$  (600 MHz,  $\text{C}_6\text{D}_{12}$ , 25 °C) and  $^{19}\text{F}$  (564 MHz,  $\text{C}_6\text{D}_{12}$ , 25 °C) NMR non-equivalences ( $|\delta_R - \delta_S|$ , ppm) of COMP B (30 mM) in the presence of AcSi $\beta$ CD or AcSi $\gamma$ CD at different molar ratios; the results reported in parenthesis refer to the 10 mM concentration.

Figure S4.  $^1\text{H}$  (600 MHz, 25 °C,  $\text{C}_6\text{D}_{12}$ ) NMR spectra of COMP B (30 mM) alone (a) and in the presence of AcSi $\gamma$ CD to give a COMP B/CD molar ratio of 8:1 (b), 4:1 (c), 3:1 (d) and 2:1 (e). The other resonances belong to CSA.

Figure S5.  $^{19}\text{F}$  (564 MHz, 25 °C,  $\text{C}_6\text{D}_{12}$ ) NMR spectra of COMP B (30 mM) alone (a) and in the presence of AcSi $\gamma$ CD to give a COMP B/CD molar ratio of 8:1 (b), 4:1 (c), 3:1 (d) and 2:1 (e).

Figure S6.  $^1\text{H}$  (600 MHz, 25 °C,  $\text{C}_6\text{D}_{12}$ ) NMR spectrum of racemic 1-to-1 DSF/AcSi $\gamma$ CD mixture (a) and 1D-ROESY (600 MHz, 25 °C,  $\text{C}_6\text{D}_{12}$ , mixing time = 400 ms) spectra of  $\text{CHCF}_3$  (b) and  $\text{CHF}_2$  (c) resonances.

Figure S7.  $^1\text{H}$  (600 MHz, 25 °C,  $\text{C}_6\text{D}_{12}$ ) NMR spectrum of racemic 1-to-1 ENF/AcSi $\gamma$ CD mixture (a) and 1D-ROESY (600 MHz, 25 °C,  $\text{C}_6\text{D}_{12}$ , mixing time = 400 ms) spectra of  $\text{CHF}_2$  (b) and  $\text{CHFCl}$  (c) resonances.

Figure S8.  $^1\text{H}$  (600 MHz, 25 °C,  $\text{C}_6\text{D}_{12}$ ) NMR spectrum of racemic 1-to-1 HAL/AcSi $\gamma$ CD mixture (a) and 1D-ROESY (600 MHz, 25 °C,  $\text{C}_6\text{D}_{12}$ , mixing time = 400 ms) spectrum of  $\text{CHClBr}$  (b) resonance.

$^1\text{H}$  and  $^{19}\text{F}$  NMR spectra of ISO, DSF, HAL and ENF and  $^{19}\text{F}$  NMR spectrum of COMP B; the  $^1\text{H}$  NMR spectrum of COMP B is reported in reference [22].

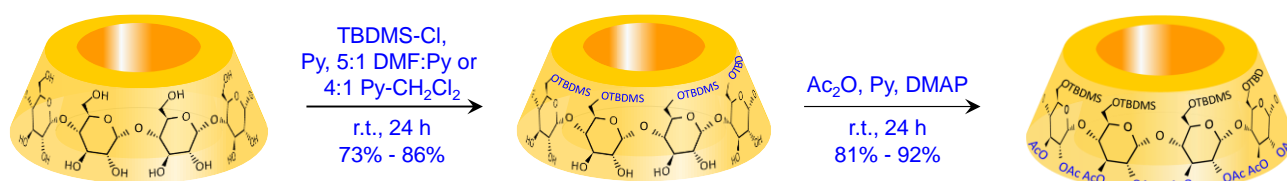

**Scheme S1:** Synthetic strategy for silylated-acetylated cyclodextrins.

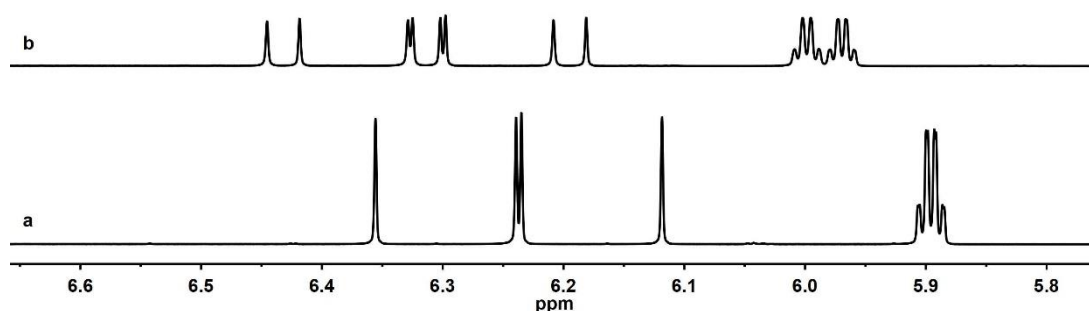

**Figure S1.**  $^1\text{H}$  (600 MHz, 30 mM, 25 °C,  $\text{C}_6\text{D}_{12}$ ) NMR spectra of racemic ISO (a) alone and (b) in the presence of AcSi $\gamma$ CD to give a ISO/CD molar ratio of 16:1.

**Table S1.**  $^1\text{H}$  (600 MHz,  $\text{C}_6\text{D}_{12}$ , 25 °C) and  $^{19}\text{F}$  (564 MHz,  $\text{C}_6\text{D}_{12}$ , 25 °C) NMR non-equivalences ( $|\delta_R - \delta_S|$ , ppm) measured for ISO resonances in the presence of equimolar amounts of AcSi $\alpha$ CD, AcSi $\beta$ CD or AcSi $\gamma$ CD at 10 mM and 30 mM concentration.

|                  |    | $ \delta_R - \delta_S $ |                |                 |                |
|------------------|----|-------------------------|----------------|-----------------|----------------|
|                  | mM | $^1\text{H}$            |                | $^{19}\text{F}$ |                |
|                  |    | $\text{CHCF}_3$         | $\text{CHF}_2$ | $\text{CF}_3$   | $\text{CHF}_2$ |
| AcSi $\alpha$ CD | 30 | -                       | -              | nd*             | 0.054/0.025    |
|                  | 10 | -                       | -              | 0.003           | 0.024/0.012    |
| AcSi $\beta$ CD  | 30 | 0.013                   | 0.019          | 0.071           | 0.121/0.018    |
|                  | 10 | 0.006                   | 0.010          | 0.038           | 0.056/0.013    |
| AcSi $\gamma$ CD | 30 | 0.083                   | 0.082          | 0.165           | 2.08/1.98      |
|                  | 10 | 0.068                   | 0.055          | 0.127           | 1.53/1.11      |

\* not determined

**Table S2.**  $^1\text{H}$  (600 MHz,  $\text{C}_6\text{D}_{12}$ , 25 °C) and  $^{19}\text{F}$  (564 MHz,  $\text{C}_6\text{D}_{12}$ , 25 °C) NMR non-equivalences ( $|\delta_R - \delta_S|$ , ppm) of DSF (30 mM) in the presence of AcSi $\beta$ CD or AcSi $\gamma$ CD at different molar ratios; the results reported in parenthesis refer to the 10 mM concentration.

|             |         | $ \delta_R - \delta_S $ |                |                 |                |              |
|-------------|---------|-------------------------|----------------|-----------------|----------------|--------------|
| Molar ratio | sub:CSA | $^1\text{H}$            |                | $^{19}\text{F}$ |                |              |
|             |         | $\text{CHCF}_3$         | $\text{CHF}_2$ | $\text{CF}_3$   | $\text{CHF}_2$ | $\text{CHF}$ |

|                |       |                  |                  |                  |                              |                  |
|----------------|-------|------------------|------------------|------------------|------------------------------|------------------|
| <b>AcSiβCD</b> | 7:1   | 0.009<br>(-)     | 0.004<br>(-)     | 0.024<br>(0.016) | 0.027/0.023<br>(0.012/0.014) | -<br>(-)         |
|                | 3.5:1 | 0.011<br>(-)     | 0.007<br>(-)     | 0.033<br>(0.018) | 0.041/0.042<br>(0.015/0.018) | -<br>(-)         |
|                | 2:1   | 0.014<br>(-)     | 0.008<br>(-)     | 0.048<br>(0.021) | 0.056/0.063<br>(0.026/0.025) | -<br>(-)         |
|                | 1:1   | 0.021<br>(0.014) | 0.010<br>(0.008) | 0.065<br>(0.050) | 0.070/0.099<br>(0.044/0.040) | -<br>(-)         |
|                |       |                  |                  |                  |                              |                  |
| <b>AcSiγCD</b> | 8:1   | 0.036<br>(0.013) | 0.027<br>(0.008) | 0.063<br>(0.020) | 0.062/0.024<br>(0.024/nd*)   | 0.048<br>(0.012) |
|                | 4:1   | 0.058<br>(0.024) | 0.038<br>(0.017) | 0.092<br>(0.060) | 0.077/0.030<br>(0.052/0.040) | 0.067<br>(0.041) |
|                | 3:1   | 0.062<br>(0.035) | 0.043<br>(0.025) | 0.119<br>(0.062) | -/-<br>(0.053/0.043)         | 0.088<br>(0.043) |
|                | 2:1   | 0.065<br>(0.043) | 0.043<br>(0.031) | 0.128<br>(0.080) | nd/nd<br>(0.061/0.054)       | 0.095<br>(0.055) |
|                | 1:1   | 0.082<br>(0.052) | 0.043<br>(0.038) | 0.131<br>(nd)    | nd/nd<br>(nd/0.064)          | 0.096<br>(nd)    |
|                |       |                  |                  |                  |                              |                  |

\* not determined.

**Table S3.** <sup>1</sup>H (600 MHz, C<sub>6</sub>D<sub>12</sub>, 25 °C) and <sup>19</sup>F (564 MHz, C<sub>6</sub>D<sub>12</sub>, 25 °C) NMR non-equivalences ( $|\delta_R - \delta_S|$ , ppm) of HAL (30 mM) in the presence of AcSiγCD at different molar ratios; the results reported in parenthesis refer to the 10 mM concentration.

|                | Molar ratio<br>sub:CSA | $ \delta_R - \delta_S $ |                  |
|----------------|------------------------|-------------------------|------------------|
|                |                        | CH                      | CF <sub>3</sub>  |
| <b>AcSiβCD</b> | 7:1                    | 0.002<br>(0.001)        | 0.006<br>(0.001) |
|                | 3.5:1                  | 0.003<br>(0.001)        | 0.009<br>(0.004) |
|                | 2:1                    | 0.005<br>(0.001)        | 0.012<br>(0.005) |
|                | 1:1                    | 0.008<br>(0.003)        | 0.023<br>(0.009) |
|                |                        |                         |                  |
| <b>AcSiγCD</b> | 8:1                    | 0.002<br>(0.001)        | 0.002<br>(-)     |
|                | 4:1                    | 0.005<br>(0.002)        | 0.005<br>(-)     |
|                | 3:1                    | 0.007<br>(0.003)        | 0.007<br>(0.003) |
|                | 2:1                    | 0.009<br>(0.004)        | 0.009<br>(0.004) |
|                | 1:1                    | 0.014<br>(0.009)        | 0.013<br>(0.008) |
|                |                        |                         |                  |

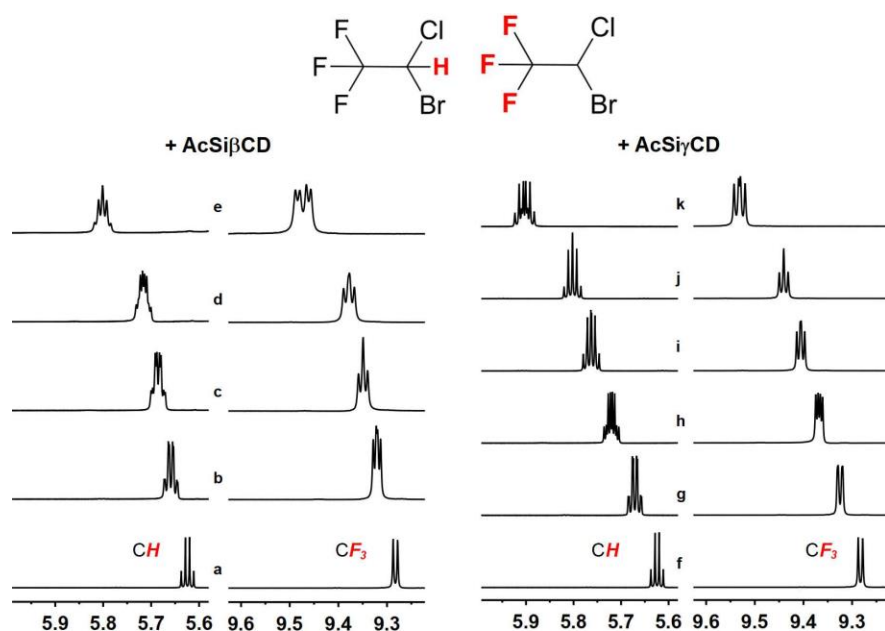

**Figure S2.**  $^1\text{H}$  (600 MHz, 25 °C,  $\text{C}_6\text{D}_{12}$ ) and  $^{19}\text{F}$  (564 MHz, 25 °C,  $\text{C}_6\text{D}_{12}$ ) NMR spectra of HAL (30 mM) alone (a, f), in the presence of (left) AcSi $\beta$ CD to give a HAL/CD molar ratio of 7:1 (b), 3.5:1 (c), 2:1 (d) and 1:1 (e), and in the presence of (right) AcSi $\gamma$ CD to give a HAL/CD molar ratio of 8:1 (g), 4:1 (h), 3:1 (i), 2:1 (j) and 1:1 (k).

**Table S4.**  $^1\text{H}$  (600 MHz,  $\text{C}_6\text{D}_{12}$ , 25 °C) and  $^{19}\text{F}$  (564 MHz,  $\text{C}_6\text{D}_{12}$ , 25 °C) NMR non-equivalences ( $|\delta_R - \delta_S|$ , ppm) of ENF (30 mM) in the presence of AcSi $\beta$ CD or AcSi $\gamma$ CD at different molar ratio; the results reported in parenthesis refer to the 10 mM concentration.

|                  | Molar<br>ratio | $ \delta_R - \delta_S $ |                  |                 |                 |                  |
|------------------|----------------|-------------------------|------------------|-----------------|-----------------|------------------|
|                  |                | $^1\text{H}$            |                  |                 | $^{19}\text{F}$ |                  |
|                  | sub:CSA        | CHCl                    | CHF <sub>2</sub> | CF <sub>2</sub> | CHFCI           | CHF <sub>2</sub> |
| AcSi $\beta$ CD  | 7:1            | 0.002                   | 0.002            | -               | -               | nd*              |
|                  |                | (-)                     | (-)              | (-)             | (-)             | (nd)             |
|                  | 3.5:1          | 0.003                   | 0.005            | -               | -               | nd               |
|                  |                | (-)                     | (-)              | (-)             | (-)             | (nd)             |
|                  | 2:1            | 0.004                   | 0.004            | -               | -               | nd               |
|                  |                | (-)                     | (-)              | (-)             | (-)             | (nd)             |
|                  | 1:1            | 0.007                   | 0.005            | -               | -               | nd               |
|                  |                | (0.002)                 | (0.003)          | (-)             | (-)             | (nd)             |
|                  | 8:1            | 0.002                   | -                | -/-             | 0.010           | nd               |
|                  |                | (-)                     | (-)              |                 | (-)             | (nd)             |
| AcSi $\gamma$ CD | 4:1            | 0.004                   | -                | nd/nd           | 0.020           | nd               |
|                  |                | (-)                     | (-)              | (-/-)           | (0.006)         | (nd)             |
|                  | 3:1            | 0.006                   | -                | 0.025/0.021     | 0.020           | nd               |
|                  |                | (0.002)                 | (-)              | (-/-)           | (0.009)         | (nd)             |
|                  | 2:1            | 0.007                   | -                | 0.041/0.038     | 0.021           | nd               |
|                  |                | (0.004)                 | (-)              | (-/-)           | (0.017)         | (nd)             |
|                  | 1:1            | 0.007                   | 0.004            | 0.089/0.071     | 0.030           | nd               |
|                  |                | (0.006)                 | (-)              | (0.027/0.026)   | (0.019)         | (nd)             |

\* not determined.

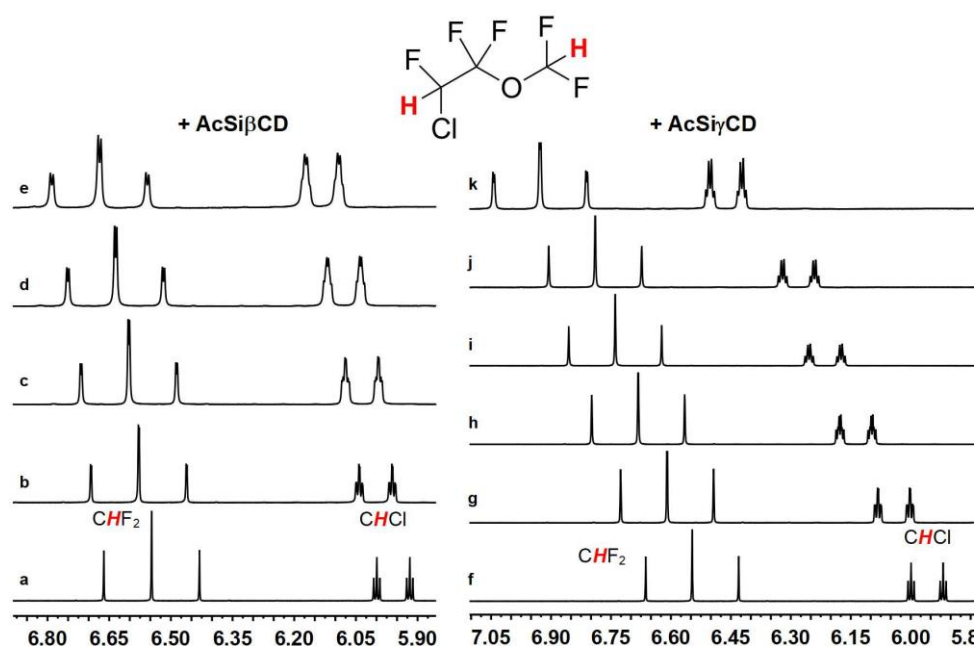

**Figure S3.**  $^1\text{H}$  (600 MHz, 25 °C,  $\text{C}_6\text{D}_{12}$ ) NMR spectra of ENF (30 mM) alone (a, f), in the presence of (left) AcSi $\beta$ CD to give a ENF/CD molar ratio of 7:1 (b), 3.5:1 (c), 2:1 (d) and 1:1 (e), and in the presence of (right) AcSi $\gamma$ CD to give a ENF/CD molar ratio of 8:1 (g), 4:1 (h), 3:1 (i), 2:1 (j) and 1:1 (k).

**Table S5.**  $^1\text{H}$  (600 MHz,  $\text{C}_6\text{D}_{12}$ , 25 °C) and  $^{19}\text{F}$  (564 MHz,  $\text{C}_6\text{D}_{12}$ , 25 °C) NMR non-equivalences ( $|\delta_R - \delta_S|$ , ppm) of COMP B (30 mM) in the presence of AcSi $\beta$ CD or AcSi $\gamma$ CD at different molar ratios; the results reported in parenthesis refer to the 10 mM concentration.

|                  | Molar ratio | $ \delta_R - \delta_S $ |                              |                  |                  |                              |                       |
|------------------|-------------|-------------------------|------------------------------|------------------|------------------|------------------------------|-----------------------|
|                  |             | $^1\text{H}$            |                              |                  |                  | $^{19}\text{F}$              |                       |
|                  |             | sub:CSA                 | $\text{CH}_2$                | $\text{CH}$      | $\text{OCH}_3$   | $\text{CF}_2$                | $\text{CH}_2\text{F}$ |
| AcSi $\beta$ CD  | 7:1         |                         | 0.007/0.007<br>(0.004/0.004) | 0.009<br>(0.004) | 0.002<br>(-)     | 0.038/0.066<br>(0.006/0.005) | 0.036<br>(0.023)      |
|                  | 3.5:1       |                         | 0.013/0.015<br>(0.005/0.005) | 0.020<br>(0.010) | 0.004<br>(0.001) | nd*/0.128<br>(0.063/0.047)   | 0.073<br>(0.038)      |
|                  | 2:1         |                         | nd/nd<br>(nd/nd)             | 0.029<br>(0.014) | 0.006<br>(0.003) | 0.116/0.190<br>(0.103/0.067) | 0.098<br>(0.062)      |
|                  | 1:1         |                         |                              |                  |                  |                              |                       |
| AcSi $\gamma$ CD | 8:1         |                         | 0.075/0.065<br>(0.065/0.058) | 0.103<br>(0.116) | 0.041<br>(0.037) | 1.021/0.93<br>(0.82/0.67)    | 0.778<br>(0.672)      |
|                  | 4:1         |                         | nd/nd<br>(nd/0.102)          | 0.182<br>(0.187) | 0.074<br>(0.062) | 1.85/1.56<br>(1.39/1.18)     | 1.41<br>(1.08)        |
|                  | 3:1         |                         | 0.177/0.174<br>(0.144/0.143) | 0.336<br>(0.293) | 0.104<br>(0.092) | 2.47/2.03<br>(2.09/1.74)     | 1.81<br>(1.63)        |
|                  | 2:1         |                         | 0.210/0.207<br>(0.182/nd)    | 0.394<br>(0.344) | 0.115<br>(0.106) | 3.02/2.39<br>(2.55/2.14)     | 2.10<br>(1.91)        |
|                  | 1:1         |                         |                              |                  |                  |                              |                       |
|                  |             |                         |                              |                  |                  |                              |                       |

\* not determined

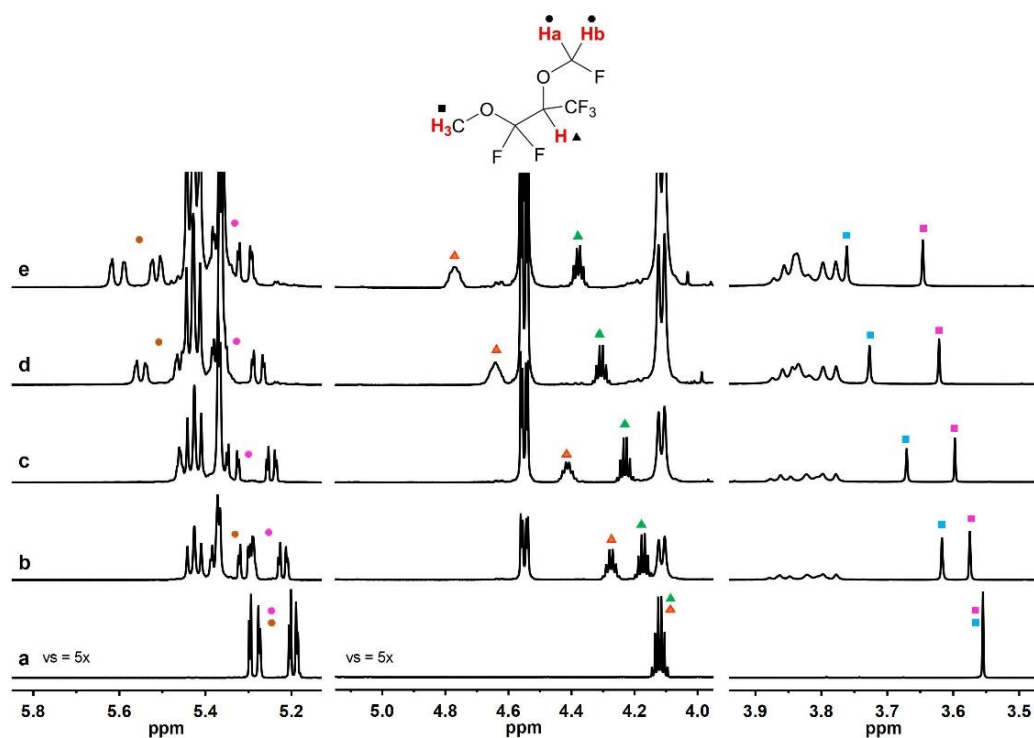

**Figure S4.**  $^1\text{H}$  (600 MHz, 25 °C,  $\text{C}_6\text{D}_{12}$ ) NMR spectra of COMP B (30 mM) alone (a) and in the presence of AcSi $\gamma$ CD to give a COMP B/CD molar ratio of 8:1 (b), 4:1 (c), 3:1 (d) and 2:1 (e). The other resonances belong to CSA.

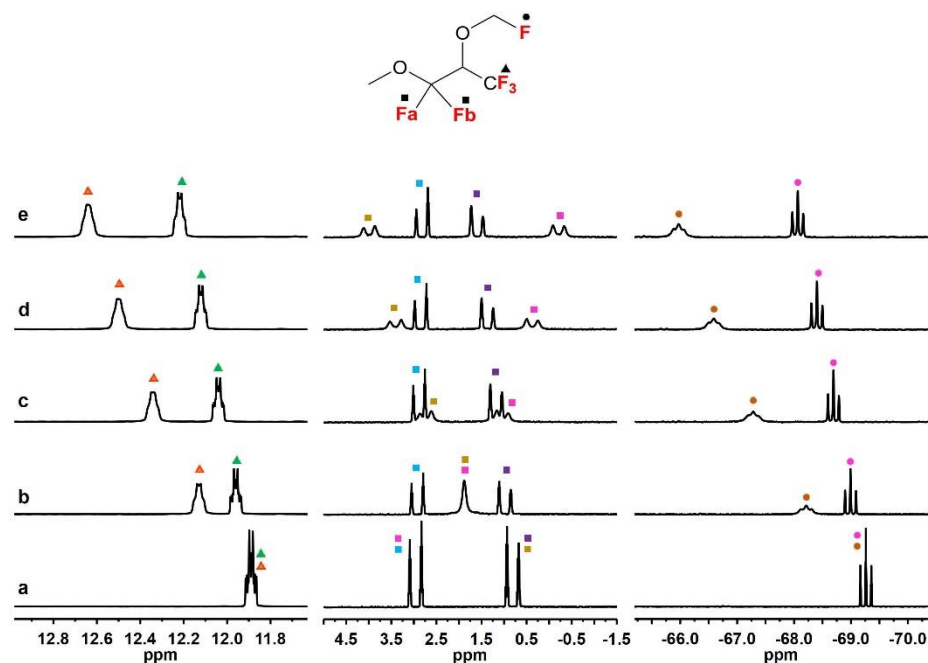

**Figure S5.**  $^{19}\text{F}$  (564 MHz, 25 °C,  $\text{C}_6\text{D}_{12}$ ) NMR spectra of COMP B (30 mM) alone (a) and in the presence of AcSi $\gamma$ CD to give a COMP B/CD molar ratio of 8:1 (b), 4:1 (c), 3:1 (d) and 2:1 (e).

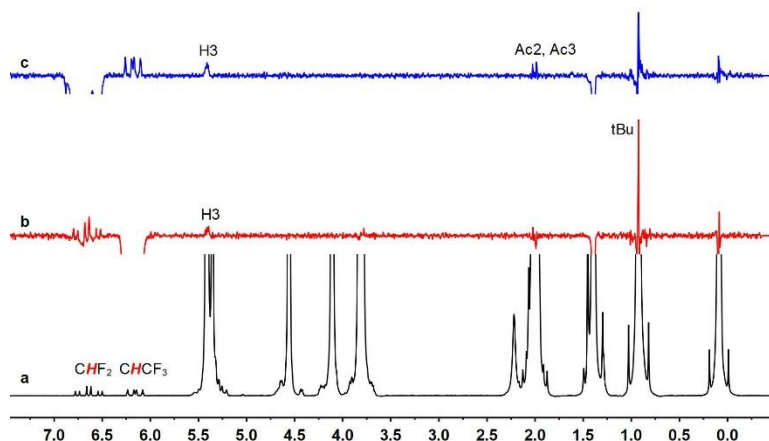

**Figure S6.**  $^1\text{H}$  (600 MHz, 25  $^\circ\text{C}$ ,  $\text{C}_6\text{D}_{12}$ ) NMR spectrum of racemic 1-to-1 DSF/AcSi $\gamma$ CD mixture (a) and 1D-ROESY (600 MHz, 25  $^\circ\text{C}$ ,  $\text{C}_6\text{D}_{12}$ , mixing time = 400 ms) spectra of  $\text{CHCF}_3$  (b) and  $\text{CHF}_2$  (c) resonances.

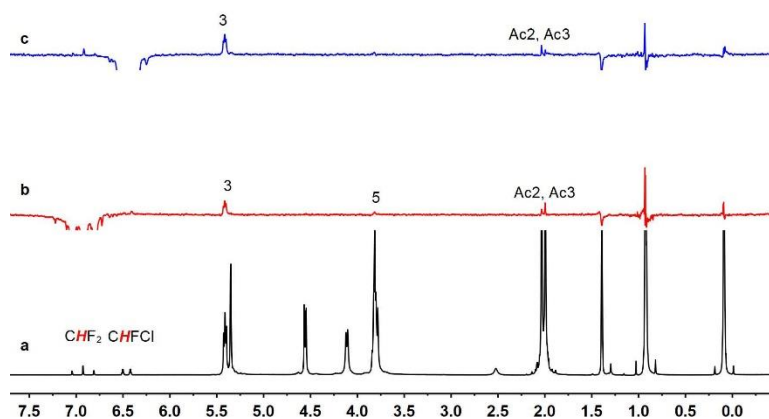

**Figure S7.**  $^1\text{H}$  (600 MHz, 25  $^\circ\text{C}$ ,  $\text{C}_6\text{D}_{12}$ ) NMR spectrum of racemic 1-to-1 ENF/AcSi $\gamma$ CD mixture (a) and 1D-ROESY (600 MHz, 25  $^\circ\text{C}$ ,  $\text{C}_6\text{D}_{12}$ , mixing time = 400 ms) spectra of  $\text{CHF}_2$  (b) and  $\text{CHFCl}$  (c) resonances.

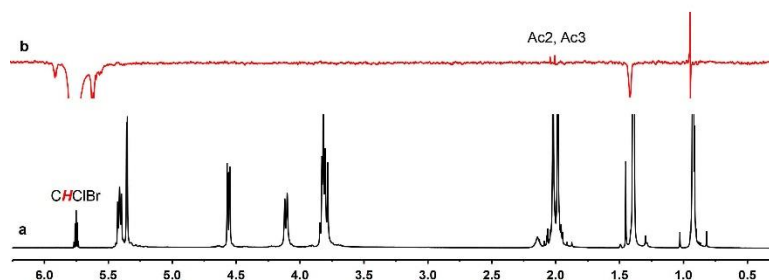

**Figure S8.**  $^1\text{H}$  (600 MHz, 25  $^\circ\text{C}$ ,  $\text{C}_6\text{D}_{12}$ ) NMR spectrum of racemic 1-to-1 HAL/AcSi $\gamma$ CD mixture (a) and 1D-ROESY (600 MHz, 25  $^\circ\text{C}$ ,  $\text{C}_6\text{D}_{12}$ , mixing time = 400 ms) spectrum of  $\text{CHClBr}$  (b) resonance.



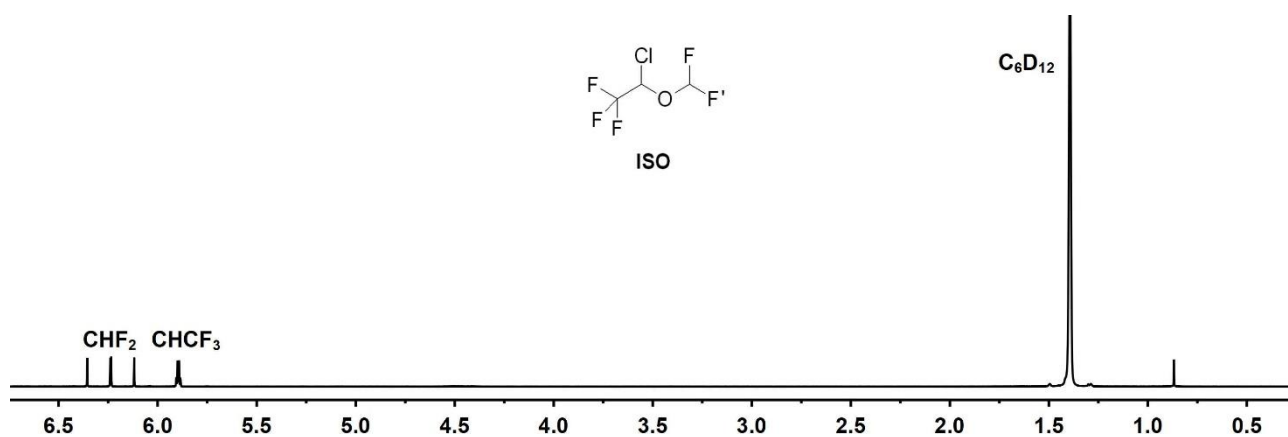

<sup>1</sup>H NMR (600 MHz, C<sub>6</sub>D<sub>12</sub>, 25 °C) spectrum of ISO.

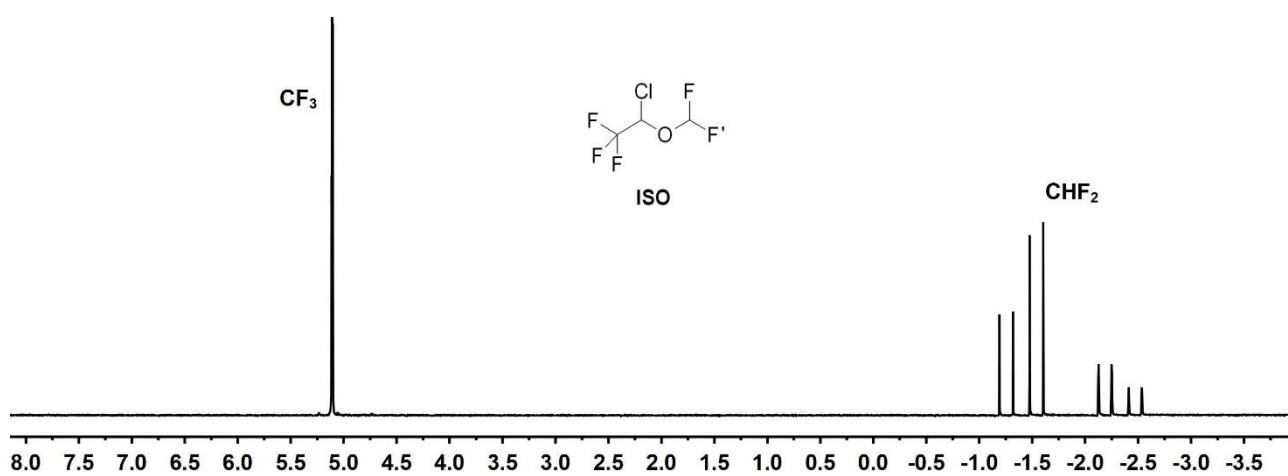

<sup>19</sup>F NMR (564 MHz, C<sub>6</sub>D<sub>12</sub>, 25 °C) spectrum of ISO.

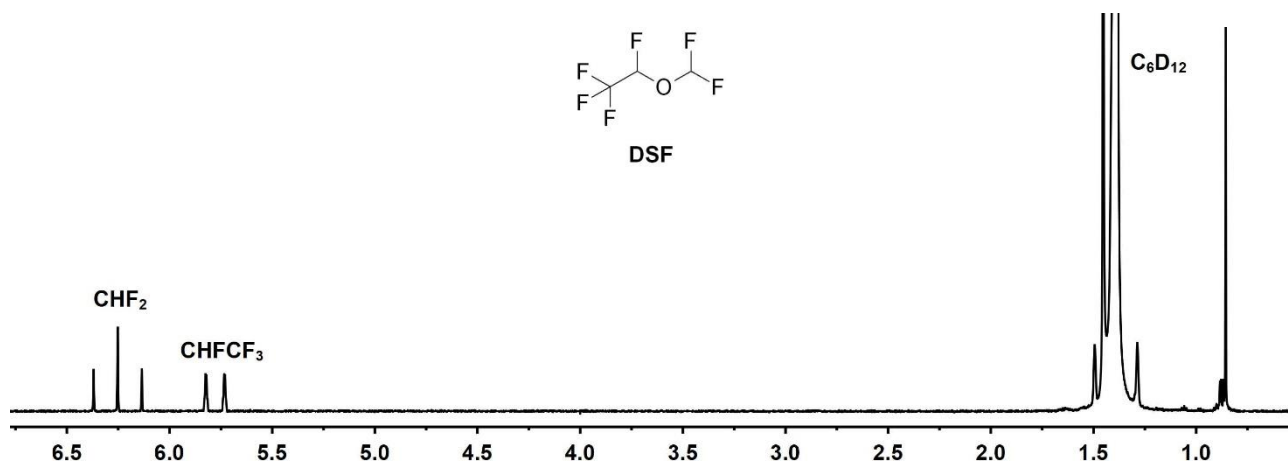

<sup>1</sup>H NMR (600 MHz, C<sub>6</sub>D<sub>12</sub>, 25 °C) spectrum of DSF.

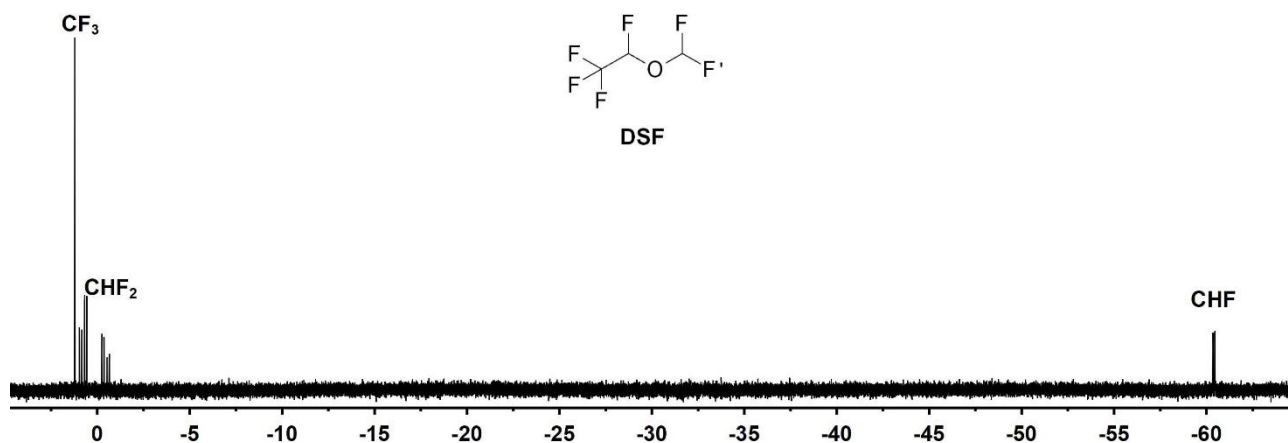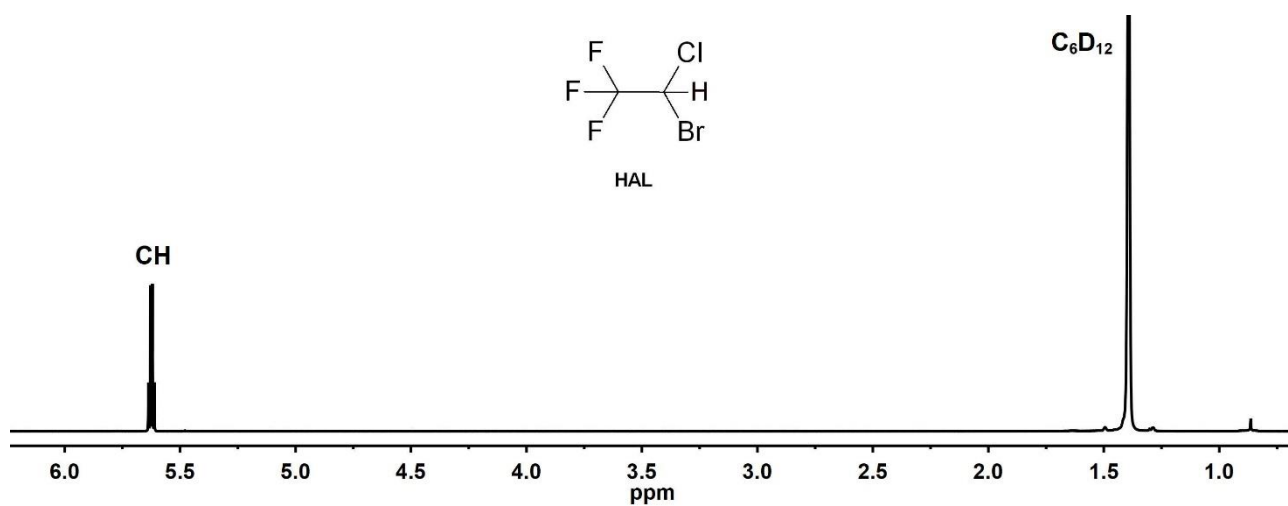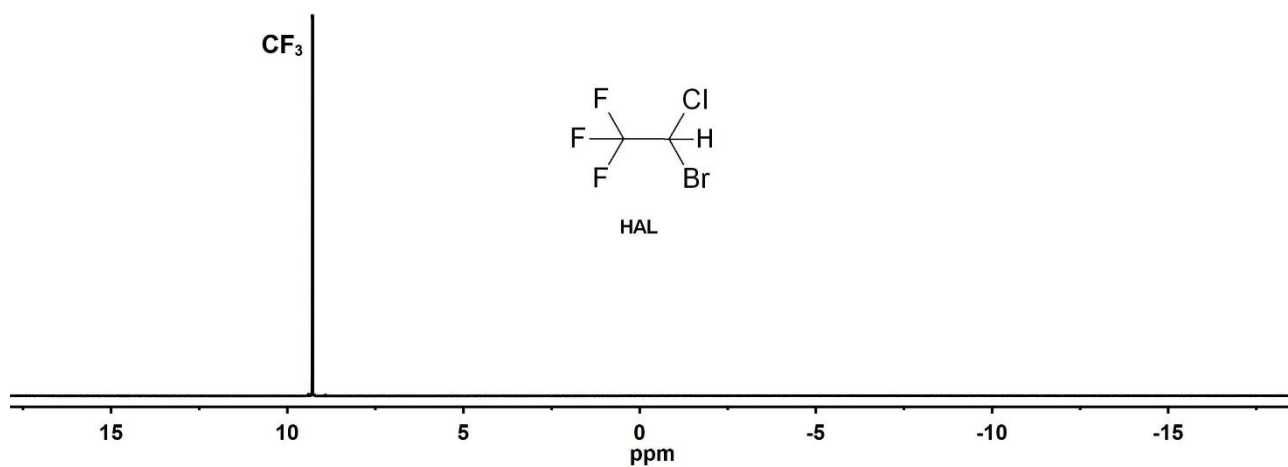

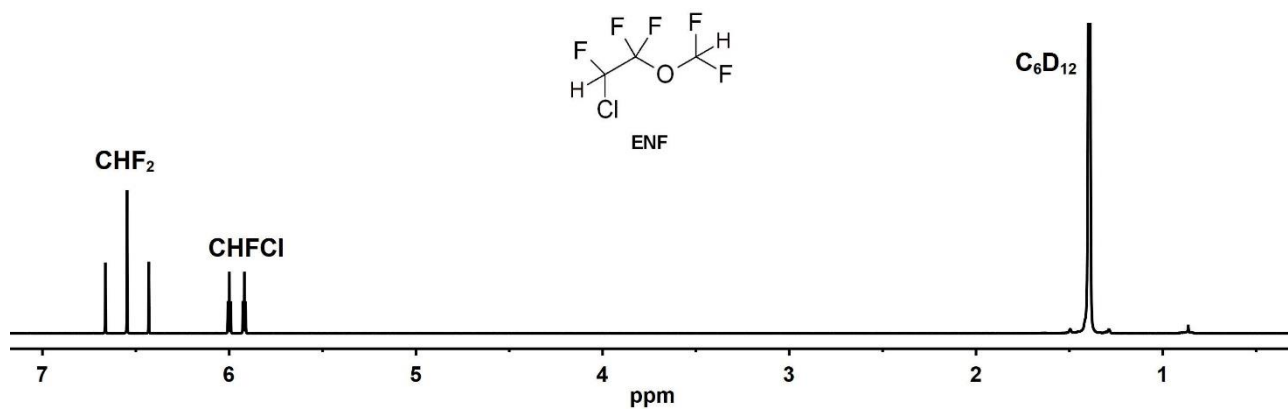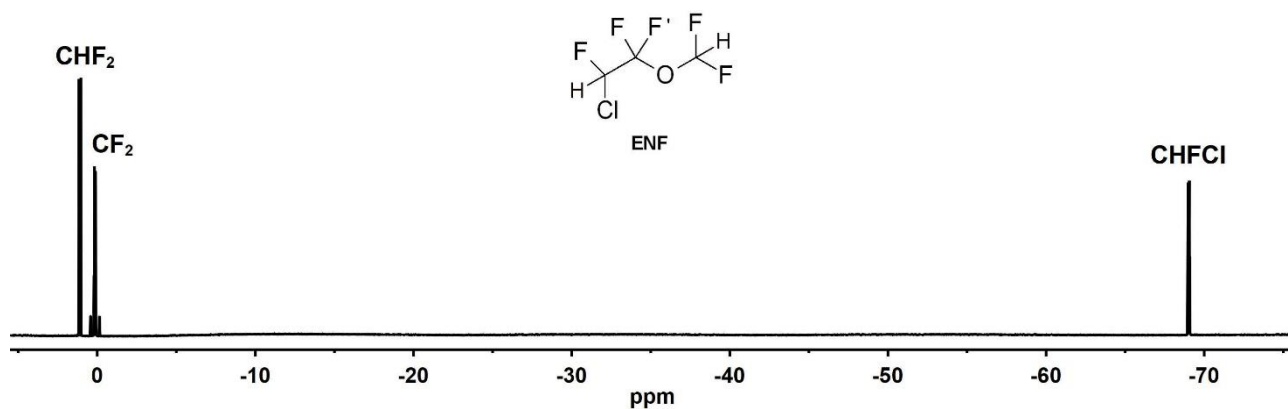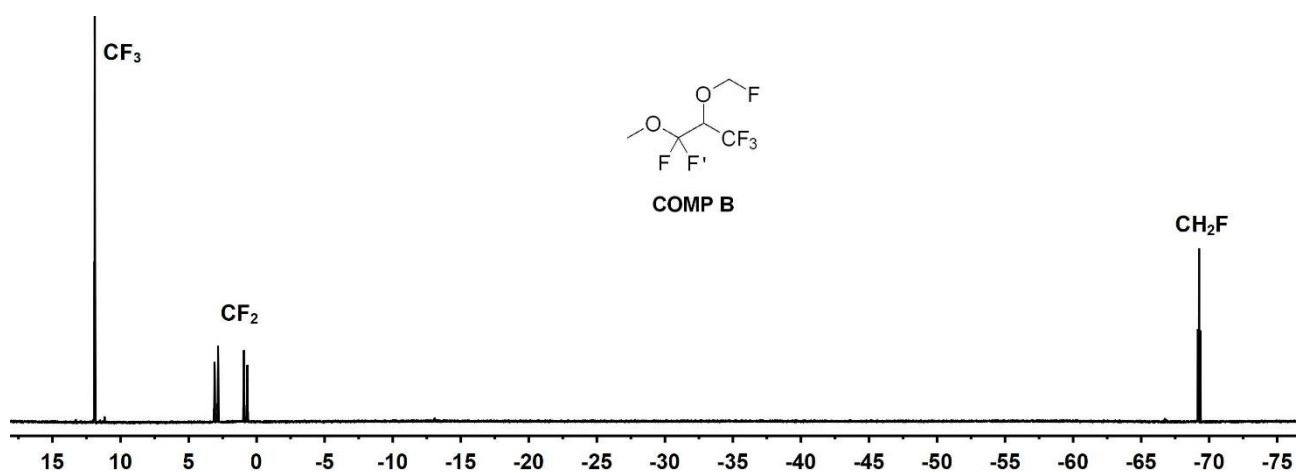

Supplement: s1 [file s1]
